# Supplementary material for: Brain–Immune Interactions as the Basis of Gulf War Illness: Clinical Assessment and Deployment Profile of 1990–1991 Gulf War Veterans in the Gulf War Illness Consortium (GWIC) Multisite Case-Control Study
Source: MDPI journal article supplement (doi:10.3390/brainsci11091132), 2021-08-26
Supplement: s1 [file s1]

**Supplemental Figure 1:**  
**Gulf War Illness Consortium (GWIC) Study Exclusionary Conditions**

|                                                                                             |                                                                                                                                                                                                                                                                                                                                                                                                                                                                                                              |
|---------------------------------------------------------------------------------------------|--------------------------------------------------------------------------------------------------------------------------------------------------------------------------------------------------------------------------------------------------------------------------------------------------------------------------------------------------------------------------------------------------------------------------------------------------------------------------------------------------------------|
| <p><b><i>Exclude if condition was ever diagnosed by a physician</i></b></p>                 | <ul style="list-style-type: none"> <li>- Multiple Sclerosis</li> <li>- Lupus</li> <li>- Rheumatoid Arthritis</li> <li>- Stroke</li> <li>- Parkinson's Disease</li> <li>- ALS ( Lou Gehrig's Disease)</li> <li>- Alzheimer's Disease</li> <li>- Bipolar Disorder</li> <li>- Schizophrenia</li> </ul>                                                                                                                                                                                                          |
| <p><b><i>Exclude if diagnosed condition has been present in the last 5 years</i></b></p>    | <ul style="list-style-type: none"> <li>- Seizure disorder</li> <li>- Heart disease (high blood pressure, high cholesterol not exclusionary)</li> <li>- Kidney disease</li> <li>- Liver disease</li> <li>- Cancer (non-melanoma skin cancer not exclusionary)</li> </ul>                                                                                                                                                                                                                                      |
| <p><b><i>Excluded if veteran was hospitalized for condition in the last 5 years</i></b></p> | <ul style="list-style-type: none"> <li>- Post-traumatic stress disorder (PTSD)</li> <li>- Depression</li> <li>- Alcohol or drug dependence</li> </ul>                                                                                                                                                                                                                                                                                                                                                        |
| <p><b><i>Specific Exclusions</i></b></p>                                                    | <ul style="list-style-type: none"> <li>- Diabetes: Exclude if blood sugar has not been well-controlled for the prior 2 years</li> <li>- Chronic infectious disease: Exclude for any current chronic infectious disease lasting 6 months or longer</li> <li>- Serious injury: exclude if veteran is currently recovering from serious injury</li> <li>- Other diagnoses: Exclude any other reported current diagnosis lasting <math>\geq</math> 6 months that could account for veterans' symptoms</li> </ul> |
